# Supplementary material
Source: ML conference proceedings conference paper supplement (https://openreview.net/forum?id=uJDmJp7kn2F)
Supplement: supplementary_material [file attachment]

## A Linear regression for impulse response

In this section we prove Theorem 4.2: under iid gaussian inputs, we can obtain high-probability error bounds for the transfer function of the learned impulse response in  $\mathcal{H}_\infty$  norm. Moreover, these bounds kick in as soon as we have  $\tilde{\Omega}(L)$  samples from a *single* rollout. We note that analyzing the multiple-rollout setting as in [SOF20] is more straightforward, so we will not consider it here.

The main difficulty for analyzing linear regression is that the inputs are correlated. The most challenging step is to lower-bound the sample covariance matrix of inputs to the linear regression.

In the SISO setting, [DMR19] give concentration bounds for the covariance matrix with  $T = \tilde{\Omega}(L)$  timesteps. First, we extend this to the MIMO case in Theorem A.2 (Note that [OO19] consider the MIMO case but have extra log factors.) Then, we use Gaussian suprema arguments as in [TBPR17] to obtain bounds for the transfer function in  $\mathcal{H}_\infty$  norm (Lemma A.6).

We suppose the inputs  $u(0), \dots, u(T-1) \sim N(0, I_{d_u})$  are iid, observe  $y(0), \dots, y(T-1) \in \mathbb{R}^{d_y}$ , and perform linear regression on the finite impulse response  $F : \{0, 1, \dots, L\} \rightarrow \mathbb{R}^{d_y \times d_u}$  (which we will also treat as an element of  $\mathbb{R}^{(L+1) \times d_y \times d_u}$  without further comment).

Recall that given a sequence  $(F(t))_{t=0}^{a-1}$  where each  $F(t) \in \mathbb{C}^{m \times n}$ , the Toeplitz matrix is given by

$$\text{Toep}_{a \times b}(F) = \begin{bmatrix} F(0) & 0 & \cdots & 0 \\ F(1) & F(0) & \cdots & 0 \\ \vdots & \vdots & \ddots & \vdots \\ F(a-1) & F(a-2) & \cdots & \end{bmatrix} \in \mathbb{C}^{am \times bn}.$$

**SISO setting.** For simplicity, first consider the SISO setting:  $d_u = d_y = 1$  and  $\eta(t) \sim N(0, 1)$ . In this case, we learn a finite impulse response  $f \in \mathbb{R}^{L+1}$  by minimizing the loss function

$$\|y - u * f\|_{[0, T-1]}^2 = \sum_{t=0}^{T-1} \|y(t) - u_{t:t-L}^\top f\|^2 = \|y_{0:T-1} - Uf\|^2 \quad (9)$$

where we let  $y_{0:T-1}$  denote the vertical concatenation of  $y(0), \dots, y(T-1)$  and similarly for  $u_{t:t-L}$ , and let  $U = \text{Toep}_{T \times (L+1)}((u(t))_{t \geq 0})$ . We set  $u(t) = 0$  for  $t < 0$ . Solving the least-squares problem gives

$$f = (U^\top U)^{-1} U^\top y_{0:T-1}.$$

Suppose that the data is generated as  $y = f^* * u + \eta$  where  $\eta(t) \sim N(0, 1)$  are independent and  $f^*$  is supported on  $[0, L]$ . Later, we will consider the effect of truncating an infinite response. We abuse notation by considering  $f, f^*$  both as functions  $\mathbb{Z} \rightarrow \mathbb{R}$  and as vectors in  $\mathbb{R}^{L+1}$ , as they are supported in  $[0, L]$ . Similarly, we consider  $y, \eta$  as vectors in  $\mathbb{R}^T$ . Then as vectors in  $\mathbb{R}^T$ ,  $y = Uf^* + \eta$ . Hence the error is

$$f - f^* = (U^\top U)^{-1} U^\top (Uf^* + \eta) - f^* = (U^\top U)^{-1} U^\top \eta$$

Because  $\eta$  has iid Gaussian entries,

$$f - f^* \sim N(0, (U^\top U)^{-1}).$$

To bound this, we need to bound  $\|(U^\top U)^{-1}\|$ , and hence bound the smallest singular value of  $U^\top U$ .

**Notation for MIMO setting.** For a vector or matrix-valued function  $F : \{a, a+1, \dots, b\} \rightarrow \mathbb{C}^{d_1 \times d_2}$ , define

$$M_{F,a:b} = \begin{pmatrix} F(a)^\top \\ \vdots \\ F(b)^\top \end{pmatrix} \in \mathbb{C}^{(b-a+1)d_2 \times d_1}$$

with the indices omitted if they are clear from context.

463 **MIMO setting.** In the general case, we would like to learn  $F = (F(t) \in \mathbb{R}^{d_y \times d_u})_{t=0}^L \in$   
 464  $\mathbb{R}^{(L+1) \times d_y \times d_u}$ . Now suppose the data is generated as

$$y = F^* * u + G^* * \xi + \eta$$

465 where  $F^*, G^*$  are supported on  $[0, \infty)$  and  $\eta(t) \sim N(0, \Sigma_y), \xi(t) \sim N(0, \Sigma_x), t \geq 0$  are indepen-  
 466 dent. Let  $U = \text{Toep}_{T \times (L+1)}((u(t)^\top)_{t=0}^{T-1})$  as before. Truncating  $F^*$  and  $G^*$ , we have

$$y = (F^* \mathbb{1}_{[0, L]}) * u + (G^* \mathbb{1}_{[0, L]}) * \xi + \eta + e$$

$$\text{where } e(t) = (F^* \mathbb{1}_{[L+1, \infty)}) * u + (G^* \mathbb{1}_{[L+1, \infty)}) * \xi.$$

467 Thus, by taking the transpose and stacking vectors,

$$M_{y, 0:T-1} = U M_{F^*, 0:L-1} + W M_{G^*, 0:L-1} + M_{\eta, 0:T-1} + M_{e, 0:T-1}$$

$$\text{where } W = \text{Toep}_{T \times (L+1)}((\xi(t)^\top)^\top).$$

468 The least squares solution  $F$  minimizes  $\|Y - U M_F\|_F^2$ , so and the error is

$$M_F - M_{F^*} = (U^\top U)^{-1} U^\top M_\eta + (U^\top U)^{-1} U^\top W M_{G^*} + (U^\top U)^{-1} M_e. \quad (10)$$

### 469 A.1 Lower bounding sample covariance matrix

470 In this subsection we lower bound the sample covariance matrix.

471 **Lemma A.1.** *There is a constant  $C$  such that the following holds. Let  $u(t) \sim N(0, I_{d_u})$  and*  
 472  *$U = \text{Toep}_{T \times (L+1)}((u(t)^\top)_{t \geq 0})$ . Then for  $0 < \delta \leq \frac{1}{2}, T \geq C_1 L d_u \log(\frac{L d_u}{\delta})$ ,*

$$\mathbb{P}\left(\sigma_{\min}(U^\top U) \geq \frac{T}{2}\right) \geq 1 - \delta.$$

473 This is a corollary of the following concentration bound, which generalizes Theorem 3.4  
 474 of [DMR19] to the MIMO setting. The main additional ingredient is an  $\varepsilon$ -net argument to reduce to  
 475 the analysis of the SISO case. We also swap out the chaining argument with a use of Lemma A.4,  
 476 which allows a shorter proof.

477 **Theorem A.2.** *There is  $C$  such that the following holds. Suppose  $u(t), 0 \leq t < T$  are independent,*  
 478 *zero-mean, and  $K$ -sub-gaussian (see Definition C.1), and let  $U = \text{Toep}_{T \times (L+1)}((u(t)^\top)_{t \geq 0})$ . Then*  
 479 *for  $0 < \delta \leq \frac{1}{2}, T \geq L$ ,*

$$\left\|U^\top U - T I_{d_u}\right\| \leq C K^2 \left(L d_u \log\left(\frac{T}{\delta}\right) + \sqrt{T L d_u \log\left(\frac{T}{\delta}\right)}\right)$$

480 *with probability  $\geq 1 - \delta$ .*

481 We first note the fact that infinite Toeplitz matrices become diagonal in the Fourier basis.

482 **Lemma A.3.** *Consider the infinite block Toeplitz matrix  $(Z(j-k))_{j,k \in \mathbb{Z}} \in \mathbb{C}^{(\mathbb{Z} \times d_1) \times (\mathbb{Z} \times d_2)}$ , where*  
 483  *$Z$  is a function  $\mathbb{Z} \rightarrow \mathbb{C}^{d_1 \times d_2}$ . In the Fourier basis, it is given by the kernel  $\widehat{Z}(\omega_1) \mathbb{1}_{\omega_1 = \omega_2}$ . That is,*  
 484 *if  $v : \mathbb{Z} \rightarrow \mathbb{R}^{d_2}, \|Z\|_1, \|v\|_1 < \infty$ , then letting*

$$w(j) = \sum_k Z(j-k) v(k),$$

485 *we have*

$$\widehat{w}(\omega) = \widehat{Z}(\omega) \widehat{v}(\omega).$$

486 Here,  $\widehat{Z}(\omega)$  is called the **multiplication polynomial** of the matrix.

487 *Proof.* Simply note that  $w = Z * v$  and so  $\widehat{w} = \widehat{Z} \widehat{v}$ . □

488 We will use the following lemma in order to bound the maximum of the Fourier transform by the  
 489 maximum at a finite number of points.

490 **Lemma A.4** ([BTR13]). *Let  $Q(z) := \sum_{k=0}^{r-1} a_k z^k$ , where  $a_k \in \mathbb{C}$ . For any  $N \geq 4\pi r$ ,  $\|Q\|_{\mathcal{H}_\infty} \leq$   
 491  $(1 + \frac{4\pi r}{N}) \max_{j=0, \dots, N-1} |Q(e^{\frac{2\pi i j}{N}})|$ .*

492 *Proof of Theorem A.2.* By rescaling we may suppose  $K = 1$ . Decompose

$$U = U_1 + U_2 \text{ where} \quad (11)$$

$$U_1 = \begin{pmatrix} u(0)^\top & & \mathbf{0} \\ \vdots & \ddots & u(0)^\top \\ u(T-L-1)^\top & \ddots & \vdots \\ \mathbf{0} & & u(T-L-1)^\top \end{pmatrix}$$

$$U_2 = \begin{pmatrix} \mathbf{0} & \dots & \dots & \mathbf{0} \\ u(T-L)^\top & & & \vdots \\ \vdots & \ddots & & \vdots \\ u(T-1)^\top & \dots & u(T-L)^\top & \mathbf{0} \end{pmatrix}.$$

493 Then

$$U^\top U = (T-L)I_{Ld_u} + (U_1^\top U_1 - (T-L)I_{Ld_u}) + U_1^\top U_2 + U_2^\top U_1 + U_2^\top U_2. \quad (12)$$

494 Let  $\mathsf{T}$  be the shift operator on functions:  $\mathsf{T}f(t) = f(t-1)$ . Let  $T' = T-L$  and let  $u^{(1)} = u\mathbb{1}_{[0, T'-1]}$ .

495 Then the  $(j, k)$ th block of  $U_1^\top U_1$  is

$$(U_1^\top U_1)_{jk} = \sum_{t \in \mathbb{Z}} (\mathsf{T}^j u^{(1)})(t) (\mathsf{T}^k u^{(1)})(t)^\top$$

Define the infinite block Toeplitz matrix in  $\mathbb{R}^{(\mathbb{Z} \times d_u) \times (\mathbb{Z} \times d_u)}$  by

$$Z_{jk} = \sum_{t=1}^T (\mathsf{T}^j u^{(1)})(t) (\mathsf{T}^k u^{(1)})(t)^\top \mathbb{1}_{|j-k| \leq L} - T' I_{\mathbb{Z} \times d_u}.$$

496 By Lemma A.3, the multiplication polynomial of this matrix is

$$\begin{aligned} P_u(\omega) &= \sum_{\ell=-L}^L \sum_{t \in \mathbb{Z}} (\mathsf{T}^\ell u^{(1)})(t) u^{(1)}(t)^\top e^{-2\pi i \ell \omega} - T' I_{d_u} \\ &= \sum_{\substack{j, k \in \mathbb{Z} \\ |j-k| \leq L}} u(j) u(k)^\top e^{2\pi i (j-k) \omega} - T' I_{d_u} \\ &= (u(0) \quad \dots \quad u(T'-1)) M \begin{pmatrix} u(0)^\top \\ \vdots \\ u(T'-1)^\top \end{pmatrix} - T' I_{d_u} \end{aligned} \quad (13)$$

497 where  $M \in \mathbb{C}^{\mathbb{Z} \times \mathbb{Z}}$  is the matrix with  $M_{jk} = e^{2\pi i (j-k) \omega} \mathbb{1}_{|j-k| \leq L}$ . In order to work with a scalar-  
 498 valued function, we consider for  $\|v\| = 1$

$$v^\top P_u(\omega) v = \sum_{j, k \in \{0, \dots, T'-1\}} \langle v, u(j) \rangle \langle v, u(k) \rangle e^{2\pi i \omega (j-k)} \mathbb{1}_{|j-k| \leq L} - T' \|v\|^2.$$

499 By Lemma A.3,

$$\|U_1^\top U_1 - T' I_{Td_u}\| \leq \|Z - T' I_{\mathbb{Z}}\| \leq \|P_u(\omega)\|_{\mathcal{H}_\infty}.$$

500 Taking  $N = \lceil 8\pi L \rceil$  and noting  $e^{2\pi i \omega L} P(\omega)$  is a polynomial of degree at most  $2L$  in  $e^{2\pi i \omega}$ , we have

$$\begin{aligned}
\|P_u(\omega)\|_{\mathcal{H}_\infty} &= \sup_{\omega \in [0,1]} \|P_u(\omega)\| = \sup_{\|v\|=1} \sup_{\omega \in [0,1]} |v^\top P_u(\omega)v| \\
&= \sup_{\|v\|=1} 2 \max_{\omega \in \{0, \frac{1}{N}, \dots\}} |v^\top P_u(\omega)v| && \text{by Lemma A.4} \\
&= 2 \max_{\omega \in \{0, \frac{1}{N}, \dots\}} \left( \sup_{v \in \mathcal{N}_\varepsilon} |v^\top P_u(\omega)v| + 3\varepsilon \|P_u(\omega)\| \right) \quad (14)
\end{aligned}$$

501 where  $\mathcal{N}_\varepsilon$  is an  $\varepsilon$ -net of the unit sphere in  $\mathbb{R}^d$ . (For arbitrary  $v'$  with  $\|v'\| = 1$ , write  $v = v' + \Delta v$   
502 where  $v \in \mathcal{N}_\varepsilon$  and  $\|\Delta v\| \leq \varepsilon$ .) We first bound  $v^\top P(\omega)v$ . Letting  $w \in \mathbb{R}^{T'}$  be the vector with  
503 entries  $w(j) = \langle v, u(j) \rangle$ , we have

$$v^\top P_u(\omega)v = w^\top M w - T' \|v\|^2.$$

504 Fix  $v$ . Because each  $u(t)$  is independent 1-subgaussian, each entry of  $w$  is 1-subgaussian. By the  
505 Hanson-Wright inequality (Theorem C.3), for some constant  $c > 0$ ,

$$\mathbb{P}(|v^\top P_u(\omega)v| > s) \leq 2 \exp \left[ -c \cdot \min \left\{ \frac{s^2}{\|M\|_F^2}, \frac{s}{\|M\|} \right\} \right].$$

506 We calculate that  $\|M\|_F^2 \leq (2L + 1)T$  and the Fourier transform of the function  $e^{2\pi i \omega t} \mathbb{1}_{|j-k| \leq L}$   
507 satisfies  $\|\widehat{f}\|_\infty \leq \|f\|_1 \leq 2L + 1$ , so by Lemma A.3,  $\|M\| \leq 2L + 1$ . Then for appropriate  $C$ ,

$$\mathbb{P} \left( |v^\top P_u(\omega)v| > C \left( \sqrt{TL \log \left( \frac{1}{\delta_1} \right)} + L \log \left( \frac{1}{\delta_1} \right) \right) \right) \leq \delta_1.$$

508 Next we bound  $\|P_u(\omega)\|$  and choose  $\varepsilon$  appropriately. A crude bound with Markov's inequality  
509 suffices to bound  $\|P_u(\omega)\|$ . We have (because the second moment is at most the sub-gaussian  
510 constant)

$$\mathbb{E} \|(u(0) \ \dots \ u(T' - 1))\|_F^2 \leq \mathbb{E} \sum_{j=1}^{d_u} \sum_{t=0}^{T'-1} \langle e_j, u(t) \rangle^2 \leq d_u T'$$

511 so with probability  $\geq 1 - \delta_2$ ,  $\|(u(0) \ \dots \ u(T' - 1))\|_F^2 \leq \frac{d_u T'}{\delta_2}$ . Hence, for every  $\omega \in [0, 1]$ ,  
512 by (13),

$$\|P_u(\omega) + T' I_{d_u}\| \leq \|(u(0) \ \dots \ u(T' - 1))\|_F^2 \|M\| \leq \frac{d_u T'}{\delta_2} 2L.$$

513 Choose  $\varepsilon = \frac{\delta_2}{2d_u LT}$ . Then with probability  $\geq 1 - \delta_2$ , we have

$$\sup_{\omega \in [0,1]} 3\varepsilon \|P_u(\omega)\| \leq 3 \cdot \frac{\delta_2}{2d_u LT} \cdot \left( \frac{d_u T'}{\delta_2} 2L + T' \right) \leq 4.5.$$

514 Now take  $\delta_1 = \frac{\delta}{2}$ . By Cor. 4.2.13 of [Ver18], there is an  $\varepsilon$ -net of size  $|\mathcal{N}_\varepsilon| \leq \left(1 + \frac{2}{\varepsilon}\right)^{d_u} =$   
515  $\exp \left( d_u \log \left( 1 + \frac{2}{\varepsilon} \right) \right) = \exp \left( d_u \log \left( 1 + \frac{8d_u LT}{\delta} \right) \right)$ . Letting  $\delta_1 = \frac{\delta}{2|\mathcal{N}_\varepsilon|}$  and taking a union bound,  
516 with probability  $1 - \delta$  we get

$$(14) \leq C \left( \sqrt{TL d \log \left( \frac{T}{\delta} \right)} + L d \log \left( \frac{T}{\delta} \right) \right)$$

517 Next consider the term  $U_1^\top U_2$ . Let  $u^{(1)} = u \mathbb{1}_{[0, T'-1]}$ ,  $u^{(2)} = u \mathbb{1}_{[T', T-1]}$ . This is part of the infinite  
 518 Toeplitz matrix with  $Z_{jk} = \sum_{t \in \mathbb{Z}} (\mathbb{T}^j u^{(1)})(t) (\mathbb{T}^k u^{(2)})(t)^\top \mathbb{1}_{|j-k| \leq L-1}$ . In the Fourier basis,

$$\begin{aligned} P_{u,12}(\omega) &= \sum_{\substack{j, k \in \mathbb{Z} \\ |j-k| \leq L}} \sum_{t \in \mathbb{Z}} e^{-2\pi i j \omega} (\mathbb{T}^j u^{(1)})(t) (\mathbb{T}^k u^{(2)})(t)^\top e^{2\pi i k \omega} \\ &= \sum_{\substack{j, k \in \mathbb{Z} \\ |j-k| \leq L}} \mathbb{1}_{[0, T'-1]}(j) \mathbb{1}_{[T-L, T-1]}(k) e^{2\pi i (j-k) \omega} u(j) u(k)^\top \\ &= (u(0) \quad \cdots \quad u(T'-1)) M \begin{pmatrix} u(0)^\top \\ \vdots \\ u(T'-1)^\top \end{pmatrix} \end{aligned}$$

519 where  $M_{jk} = \mathbb{1}_{[0, T'-1]}(j) \mathbb{1}_{[T-L, T-1]}(k) \mathbb{1}_{|j-k| \leq L} e^{2\pi i (j-k) \omega}$ . As before, we have

$$\left\| U_1^\top U_2 \right\| \leq 2 \max_{\omega \in \{0, \frac{1}{N}, \dots\}} \sup_{v \in \mathcal{N}_\varepsilon} |v^\top P_{u,12}(\omega) v| + 3\varepsilon \|P_{u,12}(\omega)\|.$$

520 We calculate  $\|M\|_F^2 \leq (T-L)(2L+1)$  and each block in  $M$  is part of a Toeplitz matrix, so similarly  
 521 to before  $\|M\| \leq 2L+1$ . Hence, with probability at least  $1 - \delta$ ,

$$\left\| U_1^\top U_2 \right\| \leq C \left( \sqrt{TL \log \left( \frac{1}{\delta} \right)} + L \log \left( \frac{1}{\delta} \right) \right)$$

522 Note  $\|U_1^\top U_2\| = \|U_2^\top U_1\|$ . Finally, we bound  $U_2^\top U_2$ . Note  $U_2$  is part of an infinite Hankel matrix  
 523 with entries  $u(T'+1)^\top, \dots, u(T'+L)^\top$ . The multiplication polynomial is

$$P_{u,2}(\omega) = e^{-2\pi i (T-L) \omega} \sum_{t=0}^{L-1} u(T-L+t)^\top e^{-2\pi i t \omega}.$$

524 The real part is  $C \left( \sum_{t=T-L}^{T-1} \cos^2(-2\pi t \omega) \right)^{1/2}$ -sub-gaussian and the imaginary part is  
 525  $C \left( \sum_{t=T-L}^{T-1} \sin^2(-2\pi t \omega) \right)^{1/2}$ -sub-gaussian for some constant  $C$ . Hence

$$\mathbb{P} \left( \langle e_j, P_{u,2}(\omega) \rangle^2 \leq CL \log \left( \frac{1}{\delta} \right) \right) \geq 1 - \delta.$$

526 Using this for  $j = 1, \dots, d_u$ , replacing  $\delta \leftarrow \frac{\delta}{d_u}$ , and using a union bound gives

$$\mathbb{P} \left( \|P_{u,2}(\omega)\|^2 \leq CL d_u \log \left( \frac{d}{\delta} \right) \right) \geq 1 - \delta.$$

527 Now for  $N \geq 4\pi L$ , using another union bound gives

$$\begin{aligned} \left\| U_2^\top U_2 \right\| &\leq \left( \sup_{\omega \in [0, 1]} \|P_{u,2}(\omega)\| \right)^2 \\ &\leq \left( 2 \max_{\omega \in \{0, \frac{1}{N}, \dots\}} \|P_{u,2}(\omega)\| \right)^2 \\ &\leq CL d_u \log \left( \frac{d_u L}{\delta} \right). \end{aligned}$$

528 with probability  $\geq 1 - \delta$ . Putting all the bounds together with (12) gives the theorem.  $\square$

529 *Proof of Lemma A.1.* For large enough  $C_2$ , for  $T \geq C_2 L d_u \log \left( \frac{T}{\delta} \right)$ , we have that by Theorem A.2  
 530 that  $\|U^\top U - T I_{d_u}\| \leq \frac{T}{2}$ , so  $\sigma_{\min}(U^\top U) \geq \frac{T}{2}$ .

531 Finally, note that for large enough  $C_1$ ,  $T \geq C_1 L d_u \log \left( \frac{L d_u}{\delta} \right)$  implies  $T \geq C_2 L d_u \log \left( \frac{T}{\delta} \right)$ .  $\square$

532 We show here a bound similar to Theorem A.2 that will be useful to us later.

533 **Lemma A.5.** *There is a constant  $C$  such that the following holds. Suppose  $u(t)$ ,  $0 \leq t < T$   
534 are independent, zero-mean, and  $K_u$ -sub-gaussian, and similarly for  $w(t)$  with constant  $K_w$ . Let  
535  $U = \text{Toep}_{T \times (L+1)}((u(t)^\top)_{t \geq 0})$ ,  $W = \text{Toep}_{T \times (L+1)}((w(t)^\top)_{t \geq 0})$ . Then for  $0 < \delta \leq \frac{1}{2}$ ,  $T \geq$   
536  $C_1 L d_u \log\left(\frac{L d_u}{\delta}\right)$ ,*

$$\|U^\top W\| \leq C K_u K_w \left( L d_u \log\left(\frac{T}{\delta}\right) + \sqrt{T L d_u \log\left(\frac{T}{\delta}\right)} \right)$$

537 with probability at least  $1 - \delta$ .

538 *Proof.* By scaling we may assume  $K_u = K_w = 1$ . Decompose  $U = U_1 + U_2$  and  $W = W_1 + W_2$   
539 as in (11). Let  $S_a = \{0, \dots, T - L - 1\}$  and  $S_b = \{T - L, \dots, T - 1\}$ . We have

$$U^\top W = \sum_{a,b \in \{0,1\}} U_a^\top W_b.$$

540 Let  $u^{(a)} = u \mathbb{1}_{S_a}$  and similarly define  $w^{(b)} = w \mathbb{1}_{S_b}$ . Then the  $(j, k)$ th block of  $U_a^\top W_b$  is

$$(U_a^\top W_b)_{jk} = \sum_{t \in \mathbb{Z}} (\mathbb{T}^j u^{(a)})(t) (\mathbb{T}^k w^{(b)})(t)^\top.$$

541 This is part of the infinite block Toeplitz matrix in  $\mathbb{R}^{(\mathbb{Z} \times d_u) \times (\mathbb{Z} \times d_u)}$  defined by

$$Z_{jk} = \sum_{t \in \mathbb{Z}} (\mathbb{T}^j u^{(a)})(t) (\mathbb{T}^k w^{(b)})(t)^\top \mathbb{1}_{|j-k| \leq L},$$

542 with multiplication polynomial

$$\begin{aligned} P_{u,ab}(\omega) &= \sum_{|j-k| \leq L} u^{(a)}(j) w^{(b)}(k) e^{2\pi i(j-k)\omega} \\ &= (u(0) \ \dots \ u(T-1)) M \begin{pmatrix} w(0)^\top \\ \vdots \\ w(T-1)^\top \end{pmatrix} \end{aligned}$$

$$\text{where } M_{jk} = e^{2\pi i(j-k)} \mathbb{1}_{j \in S_a} \mathbb{1}_{k \in S_b} \mathbb{1}_{|j-k| \leq L}.$$

543 We calculate that  $\|M\|_F^2 \leq T(2L+1)$  and  $\|M\| \leq 2L+1$  so the same argument as in Theorem A.2  
544 (but using the version of Hanson-Wright given by Corollary C.4) gives that

$$\|U^\top W\| \leq C K_u K_w \left( L d_u \log\left(\frac{T}{\delta}\right) + \sqrt{T L d_u \log\left(\frac{T}{\delta}\right)} \right).$$

545 □

## 546 A.2 Upper bound in $\mathcal{H}_\infty$ norm

547 The following Lemma A.6 generalizes the results of [TBPR17] to the MIMO setting. To get the right  
548 dimension dependence, we will use the concentration bound for covariance given by Theorem C.2.

549 **Lemma A.6.** *There is a constant  $C$  such that the following holds. Suppose that  $\eta(0), \dots, \eta(T-1) \sim$   
550  $N(0, \Sigma)$  are iid,  $\Phi \in \mathbb{R}^{(L+1)d_u \times T}$ , and  $E(0), \dots, E(L) \in \mathbb{R}^{d_y \times d_u}$  are such that*

$$\begin{pmatrix} E(0)^\top \\ \vdots \\ E(L)^\top \end{pmatrix} = M_E = \Phi M_\eta \in \mathbb{R}^{(L+1)d_u \times d_y}$$

551 For any  $0 < \delta \leq \frac{1}{2}$  and  $-1 \leq a < L - L'$ ,

$$\mathbb{P} \left( \|E \mathbb{1}_{[a+1, a+L']}\|_{\mathcal{H}_\infty} \leq C \sqrt{L'} \|\Sigma\|^{\frac{1}{2}} \|\Phi\| \sqrt{d_y + d_u + \log\left(\frac{L'}{\delta}\right)} \right) \geq 1 - \delta.$$

552 *Proof.* First, by considering

$$M_E \Sigma^{-1/2} = \Phi(M_\eta \Sigma^{-1/2}),$$

553 we may reduce to the case where  $\eta(t) \sim N(0, I_{d_u})$  are iid, i.e., all entries of  $M_\eta$  are iid standard  
554 gaussian.

555 Let  $M_\omega = (E \mathbb{1}_{[a+1, a+L']})^\wedge(\omega) \in \mathbb{C}^{d_y \times d_u}$ . Note that

$$M_\omega = (\phi_\omega^H \otimes I_{d_u}) M_E$$

$$\text{where } \phi_\omega = (e^{2\pi i k \omega} \mathbb{1}_{a+1 \leq k \leq a+L'})_{0 \leq k \leq L} \in \mathbb{R}^{L+1}$$

556 as a column vector. Because the columns of  $M_\eta$  are independent and distributed as  $N(0, I_T)$ , the  
557 columns  $m_j$  of  $M_\omega$  are independent. To bound  $M_\omega$ , it suffices to bound  $M_\omega M_\omega^H = \sum_{j=1}^{d_y} m_j m_j^H$ .  
558 Note that

$$\|\mathbb{E} m_j m_j^H\| = \|(\phi_\omega^H \otimes I_{d_u}) \Phi \Phi^\top (\phi_\omega \otimes I_{d_u})\| \leq L' \|\Phi\|^2.$$

559 Let  $\Phi' = (\phi_\omega^H \otimes I_{d_u}) \Phi \Phi^\top (\phi_\omega \otimes I_{d_u})$ . By Theorem C.2<sup>1</sup>,

$$\begin{aligned} \mathbb{P} \left( \left\| \frac{1}{d_y} \sum_{j=1}^{d_y} m_j m_j^H - \Phi' \right\| \leq CL' \|\Phi'\|^2 \left( \sqrt{\frac{d_u + s}{d_y}} + \frac{d_u + s}{d_y} \right) \right) &\geq 1 - 2e^{-s} \\ \Rightarrow \mathbb{P} \left( \left\| \frac{1}{d_y} \sum_{j=1}^{d_y} m_j m_j^H \right\| \leq CL' \|\Phi'\|^2 \left( 1 + \frac{d_u + \log(\frac{2}{\delta})}{d_y} \right) \right) &\geq 1 - \delta \end{aligned}$$

560 by taking  $u = \log(\frac{2}{\delta})$ . Multiplying by  $d_y$  gives

$$\mathbb{P} \left( \|M_\omega M_\omega^H\| \leq CL' \|\Phi'\|^2 \left( d_y + d_u + \log \left( \frac{2}{\delta} \right) \right) \right) \geq 1 - \delta.$$

561 Replacing  $\delta$  by  $\frac{\delta}{N}$ , taking the square root, and taking a union bound gives

$$\mathbb{P} \left( \max_{\omega \in \{0, \frac{1}{N}, \dots, \frac{N-1}{N}\}} \|M_\omega\| \leq C\sqrt{L'} \|\Phi'\|^{\frac{1}{2}} \sqrt{d_y + d_u + \log \left( \frac{2}{\delta} \right)} \right) \geq 1 - \delta. \quad (15)$$

562 Finally, we note that by Lemma A.4, for  $N = \lceil 4\pi L' \rceil$ ,

$$\begin{aligned} \|E \mathbb{1}_{[a+1, a+L']}\|_{\mathcal{H}_\infty} &= \sup_{\omega \in [0, 1]} \|\widehat{E \mathbb{1}_{[a+1, a+L']}}(\omega)\| = \sup_{\|v\|_2=1} \sup_{\omega \in [0, 1]} \|\widehat{E \mathbb{1}_{[a+1, a+L']}}(\omega) v\| \\ &\leq \sup_{\|v\|_2 \leq 1} \max_{\omega \in \{0, \frac{1}{N}, \dots, \frac{N-1}{N}\}} 2 \|\widehat{E \mathbb{1}_{[a+1, a+L']}}(\omega) v\| \leq 2 \max_{\omega \in \{0, \frac{1}{N}, \dots, \frac{N-1}{N}\}} \|\widehat{E \mathbb{1}_{[a+1, a+L']}}(\omega)\|. \end{aligned}$$

563 Combining this with (15) gives the result.  $\square$

564 Finally we can put everything together to obtain a  $\mathcal{H}_\infty$  error bound for linear regression.

565 **Lemma A.7.** *There are  $C_1, C_2$  such that the following hold. Suppose  $y = F^* * u + G^* * \xi + \eta$  where  $u(t) \sim N(0, I_{d_u})$ ,  $\xi(t) \sim N(0, \Sigma_x)$ ,  $\eta(t) \sim N(0, \Sigma_y)$  for  $0 \leq t < T$ ,  
566 and  $\text{Supp}(F^*), \text{Supp}(G^*) \subseteq [0, \infty)$ . Let  $F = \text{argmin}_{F \in \{0, \dots, L\} \rightarrow \mathbb{R}^{d_y \times d_u}} \sum_{t=0}^{T-1} |y(t) - (F * u)(t)|^2$ ,  $M_{G^*} = (G^*(0), \dots, G^*(L))^\top \in \mathbb{R}^{(L+1)d \times d_y}$ , and  $\varepsilon_{\text{trunc}} = \|F^* \mathbb{1}_{[L+1, \infty)}\|_{\mathcal{H}_\infty} \sqrt{d_u} +$   
569  $\|G^* \mathbb{1}_{[L+1, \infty)}\|_{\mathcal{H}_\infty} \|\Sigma_x^{1/2}\|_F$ . For  $0 < \delta \leq \frac{1}{2}$ ,  $T \geq C_1 L d_u \log(\frac{L d_u}{\delta})$ ,  $-1 \leq a < L - L'$ ,*

$$\begin{aligned} &\|(F - F^*) \mathbb{1}_{[a+1, a+L']}\|_{\mathcal{H}_\infty} \\ &\leq C_2 \left[ \sqrt{\frac{1}{T}} \left( \sqrt{\|\Sigma_y\| L' \left( d_u + d_y + \log \left( \frac{L'}{\delta} \right) \right)} + \sqrt{\|\Sigma_x\| L' L d_u \log \left( \frac{L d_u}{\delta} \right)} \|M_{G^*}\| \right) + \varepsilon_{\text{trunc}} \right] \end{aligned}$$

570 *with probability at least  $1 - \delta$ .*

<sup>1</sup>The theorem is stated for real matrices, but we can view the matrix as acting on a real vector space of twice the dimension.

571 *Proof.* By (10), using the notation defined there,

$$M_F - M_{F^*} = \underbrace{(U^\top U)^{-1} U^\top M_\eta}_{=: E_1} + \underbrace{(U^\top U)^{-1} U^\top W M_{G^*}}_{=: E_2} + \underbrace{(U^\top U)^{-1} M_e}_{=: E_3}.$$

572 We wish to bound  $\|(F - F^*) \mathbb{1}_{[a+1, a+L']}\|_{\mathcal{H}_\infty} = \sup_{\omega \in [0,1]} [(\phi_\omega^H \otimes I_{d_u})(M_F - M_{F^*})]$ .

573 We bound the contributions from  $E_1, E_2, E_3$ . First note that  $\|(U^\top U)^{-1} U^\top\|_2 = \|(U^\top U)^{-1}\|_2^{1/2}$   
 574 and by Lemma A.1, for  $T \geq C_1 L d_u \log\left(\frac{L d_u}{\delta}\right)$ , with probability  $1 - \delta$ ,  $\|(U^\top U)^{-1}\| \leq \frac{2}{T}$ . Call this  
 575 event  $\mathcal{A}$ .

576 1. Under the event  $\mathcal{A}$ , by Lemma A.6,

$$\mathbb{P}\left(\sup_{\omega \in [0,1]} [(\phi_\omega^H \otimes I_{d_u}) E_1] \leq C \sqrt{L' \|\Sigma_y\|} \sqrt{\frac{1}{T}} \sqrt{d_y + d_u + \log\left(\frac{L'}{\delta}\right)}\right) \geq 1 - \delta.$$

577 2. By Lemma A.5 and the condition on  $T$ ,

$$\|U^\top W\| \leq \|U^\top (W \Sigma_x^{-1/2})\| \|\Sigma_x\|^{1/2} \leq \sqrt{T L d_u \log\left(\frac{L d_u}{\delta}\right)} \|\Sigma_x\|$$

578 Under  $\mathcal{A}$ , we bound the spectral norm (for all  $\omega$ )

$$\begin{aligned} \|(\phi_\omega^H \otimes I_{d_u})(U^\top U)^{-1} U^\top W M_{G^*}\| &\leq \|\phi_\omega^H \otimes I_{d_u}\| \|(U^\top U)^{-1}\| \|U^\top W\| \|M_{G^*}\| \\ &\leq \sqrt{L'} \frac{C}{\sqrt{T}} \sqrt{T L d_u \log\left(\frac{L d_u}{\delta}\right)} \|\Sigma_x\| \|M_{G^*}\| \\ &\leq C \sqrt{\|\Sigma_x\| L' L d_u \log\left(\frac{L d_u}{\delta}\right)} \|M_{G^*}\|. \end{aligned}$$

579 3. Let  $\varepsilon_{\text{trunc}, F} = \|F^* \mathbb{1}_{[L+1, \infty)}\|_{\mathcal{H}_\infty}$  and similarly define  $\varepsilon_{\text{trunc}, G}$ . We bound the last term  
 580 by noting

$$\|(F^* \mathbb{1}_{[L+1, \infty)}) * u\|_2 \leq \|(F^* \mathbb{1}_{[L+1, \infty)})^\wedge \cdot \hat{u}\|_2 \leq \varepsilon_{\text{trunc}, F} \|u\|_2$$

581 and similarly  $\|(G^* \mathbb{1}_{[L+1, \infty)}) * \xi\|_2 \leq \varepsilon_{\text{trunc}, G} \|\xi\|_2$ . We

582 have  $\mathbb{P}\left(\|\eta_{0:T-1}\| > \sqrt{T d_u} + C \sqrt{\log\left(\frac{1}{\delta}\right)}\right) \leq \delta$  and

583  $\mathbb{P}\left(\|\xi_{0:T-1}\| > \sqrt{T} \left\|\Sigma_x^{1/2}\right\|_{\text{F}} + C \sqrt{\|\Sigma_x\| \log\left(\frac{1}{\delta}\right)}\right) \leq \delta$  by Theorem C.5, so condi-  
 584 tioned on event  $\mathcal{A}$ ,

$$\begin{aligned} \sup_{\omega \in [0,1]} [(\phi_\omega^H \otimes I_{d_u}) E_3] &\leq C \sqrt{\frac{1}{T}} \left( \varepsilon_{\text{trunc}, F} \left( \sqrt{T d_u} + \sqrt{\log\left(\frac{1}{\delta}\right)} \right) \right. \\ &\quad \left. + \varepsilon_{\text{trunc}, G} \left( \sqrt{T} \left\|\Sigma_x^{1/2}\right\|_{\text{F}} + \sqrt{\|\Sigma_x\| \log\left(\frac{1}{\delta}\right)} \right) \right) \end{aligned}$$

585 with probability at least  $1 - \delta$ . By the condition on  $T$ , the first terms are dominant.

586 Finish by replacing  $\delta$  by  $\frac{\delta}{4}$  and using the triangle inequality and a union bound.  $\square$

## 587 B Improved rates for learning system matrices

588 In this section, we combine Lemma 4.2 and Lemma 4.3 with bounds in [OO19] to give improved  
 589 bounds for learning the system matrices.<sup>2</sup>

<sup>2</sup>References to [OO19] are for the arXiv version <https://arxiv.org/abs/1806.05722>.



As  $L$  can be chosen to make  $\varepsilon_{\text{trunc}}$  negligible, this gives  $\sqrt{\frac{Ld}{T}}$  rates, however, with factors depending on the minimum eigenvalue of  $H$ .

We first re-do some of the bounds in [OO19] more carefully, using their notation.

**Lemma B.1** ([OO19, Lemma B.1]). *Suppose  $\sigma_{\min}(L) \geq 2\|L - \hat{L}\|$  where  $\sigma_{\min}(L)$  is the smallest nonzero singular value of  $L$ . Let rank- $d$  matrices  $L, \hat{L}$  have singular value decompositions  $U\Sigma V^*$  and  $\hat{U}\hat{\Sigma}\hat{V}^*$ . There exists a  $n \times n$  unitary matrix  $W$  so that*

$$\|U\Sigma^{1/2} - \hat{U}\hat{\Sigma}^{1/2}W\|_F^2 + \|V\Sigma^{1/2} - \hat{V}\hat{\Sigma}^{1/2}W\|_F^2 \leq \frac{4(\sqrt{2} + 1)d\|L - \hat{L}\|^2}{\sigma_{\min}(L)}.$$

*Proof.* This inequality is given as an intermediate inequality in the proof of Lemma B.1 in [OO19].

The first line gives that the LHS is  $\leq \frac{2}{\sqrt{2}-1} \frac{\|L - \hat{L}\|_F^2}{\sigma_{\min}(L)}$ . Then use the fact that  $\text{rank}(L - \hat{L}) \leq 2d$ , so  $\|L - \hat{L}\|_F^2 \leq 2d\|L - \hat{L}\|^2$ .  $\square$

Using this instead of Lemma B.1 gives the following for Theorem 4.3 of [OO19].

**Lemma B.2.** *Let  $\hat{A}, \hat{B}, \hat{C}$  be the state-space realization corresponding to the output of Ho-Kalman with input  $\hat{G}$ . Suppose the system is observable and controllable. Let  $L = \text{Hankel}_{L \times (L-1)}(F^*)$ . Suppose  $\sigma_{\min}(L) > 0$  and the low-rank approximation from Ho-Kalman satisfies  $\|L - \hat{L}\| \leq \sigma_{\min}(L)/2$ . Then there exists a unitary matrix  $W \in \mathbb{R}^{d \times d}$  such that*

$$\begin{aligned} \|B - W^{-1}\hat{B}\|_F, \|C - \hat{C}W\|_F &\leq \frac{2\sqrt{(\sqrt{2} + 1)d}\|L - \hat{L}\|}{\sqrt{\sigma_{\min}(L)}} \\ \|A - W^{-1}\hat{A}W\|_F &\leq \frac{2\sqrt{d}}{\sigma_{\min}(L)} \left( \frac{2\sqrt{\sqrt{2} + 1}\|L - \hat{L}\|}{\sigma_{\min}(L)} (2\|H^+\| + \|H^+ - \hat{H}^+\|) + \|H^+ - \hat{H}^+\| \right). \end{aligned}$$

*Proof.* We refer the reader to [OO19] for the details and just note the differences. As in [OO19], the first inequality follows from taking the square root in Lemma B.1.

For the second inequality, using Lemma B.1, the inequality for  $\|O^\dagger - X^\dagger\|_F$  becomes instead

$$\begin{aligned} \|O^\dagger - X^\dagger\|_F &\leq \|O - X\|_F \max \left\{ \|X^\dagger\|^2, \|O^\dagger\|^2 \right\} \\ &\leq \frac{2\sqrt{(\sqrt{2} + 1)d}\|L - \hat{L}\|_F}{\sigma_{\min}(L)^{1/2}} \cdot \frac{2}{\sigma_{\min}(L)} \leq \frac{4\sqrt{(\sqrt{2} + 1)d}\|L - \hat{L}\|_F}{\sigma_{\min}(L)^{3/2}} \end{aligned}$$

so that (B.3)–(B.7) become

$$\begin{aligned} \|(O^\dagger - X^\dagger)H^+Q^\dagger\|_F &\leq \frac{4\sqrt{(2 + \sqrt{2})d}\|L - \hat{L}\|_F}{\sigma_{\min}(L)^2} \|H^+\| \\ \|X^\dagger\hat{H}^+(Q^\dagger - Y^\dagger)\|_F &\leq \frac{4\sqrt{(2 + \sqrt{2})d}\|L - \hat{L}\|_F}{\sigma_{\min}(L)^2} (\|H^+\| + \|H^+ - \hat{H}^+\|). \end{aligned}$$

Substituting in (B.2) then gives the theorem.  $\square$

*Proof of Theorem 2.3.* Lemma 4.2 gives a bound on  $\|H - \hat{H}\|$ . By [OO19, Appendix B.4],

$$\|H^+ - \hat{H}^+\| \leq \|H - \hat{H}\|, \quad \|H^+\| \leq \|H\|, \quad \|L - \hat{L}\| \leq 2\|H - \hat{H}\|.$$

By Lemma 4.3,  $\|H\| \leq \|F^*\|_{\mathcal{H}_\infty} = \|\Phi_{\mathcal{D}}\|_{\mathcal{H}_\infty}$ . Plugging this into Lemma B.2 gives the theorem.  $\square$

## C Concentration bounds

In this section, we collect some useful concentration results.

**Definition C.1.** A  $\mathbb{R}$ -valued random variable  $X$  is sub-gaussian with constant  $K$  if

$$\|X\|_{\psi_2} := \inf \{s > 0 : \mathbb{E}[\exp((x/s)^2) - 1] \leq 1\} \leq K,$$

and a  $\mathbb{R}^n$ -valued random variable  $X$  is sub-gaussian with constant  $K$  if

$$\|X\|_{\psi_2} := \sup_{v \in \mathbb{S}^{n-1}} \|\langle X, v \rangle\|_{\psi_2} \leq K.$$

**Theorem C.2** ([Ver18, Ex. 4.7.3]). There is a constant  $C$  such that the following holds. Let  $X_1, \dots, X_m$  be iid copies of a random vector  $X$  in  $\mathbb{R}^n$  satisfying the sub-gaussian bound for any  $x$ ,

$$\|\langle X, x \rangle\|_{\psi_2} \leq K \mathbb{E}[\langle X, x \rangle^2].$$

Let  $\Sigma_m = \frac{1}{m} \sum_{i=1}^m X_i X_i^\top$ . Then for any  $s \geq 0$ ,

$$\mathbb{P} \left( \|\Sigma_m - \Sigma\| \leq CK^2 \left( \sqrt{\frac{n+s}{m}} + \frac{n+s}{m} \right) \|\Sigma\| \right) \geq 1 - 2e^{-s}.$$

**Theorem C.3** (Hanson-Wright inequality, [RV<sup>+</sup>13, Theorem 1.1]). There is a constant  $c > 0$  such that the following holds. Let  $A \in \mathbb{C}^{n \times n}$  be a matrix, and let  $v \in \mathbb{R}^n$  be a random vector with independent, mean-0,  $K$ -sub-gaussian entries. Then for every  $s \geq 0$ ,

$$\mathbb{P}(|v^\top A v - \mathbb{E} v^\top A v| > s) \leq 2 \exp \left[ -c \cdot \min \left\{ \frac{s^2}{K^4 \|A\|_F^2}, \frac{s}{K^2 \|A\|} \right\} \right].$$

**Corollary C.4.** There is a constant  $c > 0$  such that the following holds. Let  $A \in \mathbb{C}^{m \times n}$  be a matrix, and let  $v \in \mathbb{R}^m, w \in \mathbb{R}^n$  be random vectors with independent, mean-0,  $K_v$  and  $K_w$  sub-gaussian entries, respectively. Then for every  $s \geq 0$ ,

$$\mathbb{P}(|v^\top A w| > s) \leq 2 \exp \left[ -c \cdot \min \left\{ \frac{s^2}{K_v^2 K_w^2 \|A\|_F^2}, \frac{s}{K_v K_w \|A\|} \right\} \right].$$

*Proof.* Apply Theorem C.3 for  $v \leftarrow \begin{pmatrix} v \\ w \end{pmatrix}$  and  $A \leftarrow \begin{pmatrix} O & A \\ O & O \end{pmatrix}$ . □

**Theorem C.5** (Sub-gaussian concentration, [RV<sup>+</sup>13, Theorem 2.1]). There is a constant  $c > 0$  such that the following holds. Let  $A \in \mathbb{C}^{m \times n}$  be a matrix, and let  $v \in \mathbb{R}^n$  be a random vector with independent, mean-0,  $K$ -sub-gaussian entries. Then for every  $s \geq 0$ ,

$$\mathbb{P}(|\|Av\|_2 - \|A\|_F| > s) \leq 2 \exp \left( -\frac{cs^2}{K^4 \|A\|_F^2} \right).$$

## D Experimental details

We generate random LDS's as follows. For  $B$  and  $C$ , the rows or columns are chosen to be a random set of orthonormal vectors (depending on whether they have more rows or columns). For  $A$ , the entries are first chosen to be iid standard gaussians, and then  $A$  is re-normalized so that its maximum eigenvalue has absolute value  $\lambda_{\max}$ . For simplicity, we take  $D = O$ .

We make a slight modification of Algorithm 1 which triples the size at each iteration instead. For  $L = 3^a$ , we estimate a finite impulse response of length  $4 \cdot 3^{a-1} - 1$ . Then, for the multiscale SVD algorithm, at the  $k$ th scale ( $k \geq 1$ ), we consider the rank- $d$  SVD of  $\text{Hankel}_{\ell \times \ell}(F)$ , where  $\ell = 2 \cdot 3^{k-1}$ , and use this SVD to estimate the  $F(t)$  for  $3^{k-1} < t \leq 2^k$ . For the single-scale SVD, we estimate all  $F(t)$  from the rank- $d$  SVD of  $\text{Hankel}_{\ell \times \ell}(F)$ , where  $\ell = 2 \cdot 3^{a-1}$ .

The plots show the error  $\|F^* \mathbb{1}_{[1, L]} - F\|_2$ , where  $F$  is the estimated impulse response on  $[1, L]$ , averaged over 10 randomly generated LDS's, as a function of the time  $T$  elapsed, for the following settings of parameters:

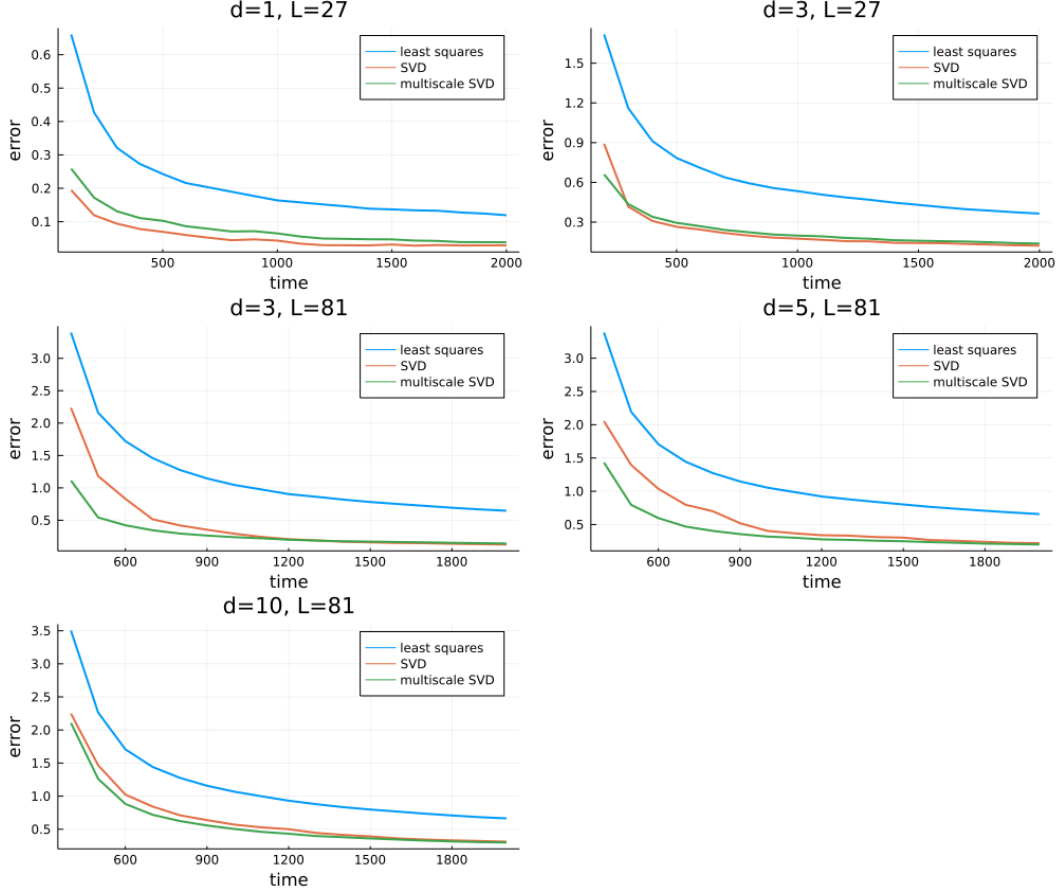

1.  $d = d_u = d_y = 1, L = 27, \lambda_{\max} = 0.9$ .
2.  $d = d_u = d_y = 3, L = 27, \lambda_{\max} = 0.9$ .
3.  $d = d_u = d_y = 3, L = 81, \lambda_{\max} = 0.95$ .
4.  $d = 5, d_u = d_y = 3, L = 81, \lambda_{\max} = 0.95$ .
5.  $d = 10, d_u = d_y = 3, L = 81, \lambda_{\max} = 0.95$ .

The code was written in Julia.

## E Open problems

We conclude with some open problems. It would be interesting to obtain analogous rates (depending on system order) for the nuclear norm regularized problem [SOF20]. Spectral methods also suggest the possibility of obtaining regret bounds for adaptive control of partially-observed systems with milder dependence on  $\frac{1}{1-\rho(A)}$ . We give several other problems below.

**Process noise.** A natural open question is to obtain better guarantees in the presence of process noise  $\xi(t)$ . We note that in Theorem 2.2, the factor multiplying  $\sqrt{\|\Sigma_x\|}$  is  $\sqrt{L} \|M_{x \rightarrow y}\|_2$ , which we expect to be on the order of  $L$  when  $L$  is the minimal sufficient memory length. This term arises because process noise can accumulate over  $L$  timesteps. In the case where  $\xi(t) \sim N(0, \Sigma_x)$  is iid gaussian, the Kalman filter shows that we can rewrite the system in the predictor form [Qin06]

$$x(t)^- = A_{\text{KF}} x(t-1)^- + B_{\text{KF}} \begin{pmatrix} u(t-1) \\ y(t-1) \end{pmatrix} \quad (16)$$

$$y(t) = Cx(t)^- + Du(t) + e(t) \quad (17)$$

656 where  $e(t) \sim N(0, \Sigma_{\text{KF}})$  for some covariance matrix  $\Sigma_{\text{KF}}$  that can be calculated in terms of  
 657  $A, B, C, \Sigma_x, \Sigma_y$ . This is now a *filtering* problem, where we have to regress the output on both  
 658 previous inputs  $u(t)$  and outputs  $y(t)$ . This is more challenging, because unlike previous  $u(t)$ , the  
 659 previous  $y(t)$  are highly correlated. One can perhaps treat this as a low-rank approximation in a  
 660 different norm.

661  **$\mathcal{H}_\infty$  error bounds.** How can we learn the system with  $\mathcal{H}_\infty$  error bounds, that is, obtain error  
 662 bounds under worst case input? This is particularly useful in control. We do not expect we can  
 663 achieve  $\sqrt{\frac{d}{T}}$  rates under iid inputs  $u(t)$ . However, it may be possible to take an active learning  
 664 approach, by maximally exciting the system at frequencies we wish to learn, as in [WJ20].

665 **Input design.** In this work we choose iid random inputs, but can we estimate more efficiently with  
 666 well-designed deterministic inputs? Can we design inputs to respect constraints such as constraints  
 667 on frequencies? [SGA20] suggests that efficient estimation is possible under general conditions on  
 668 the inputs.

669 **More general noise.** Do guarantees still hold if the noise satisfies weaker conditions such as sub-  
 670 gaussianity? A key difficulty is bounding the maximum Fourier coefficient (as in Lemma A.6).
